# Supplementary figures and images for: De Novo A-to-I RNA Editing Discovery in lncRNA
Source: MDPI journal article supplement (doi:10.3390/cancers12102959), 2020-10-13

a

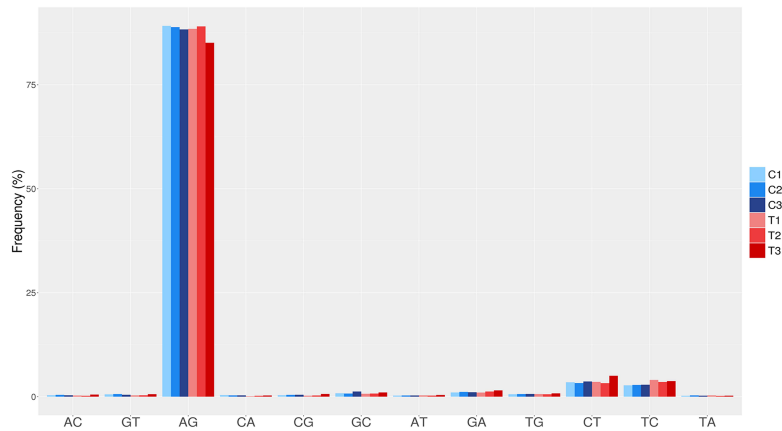

b

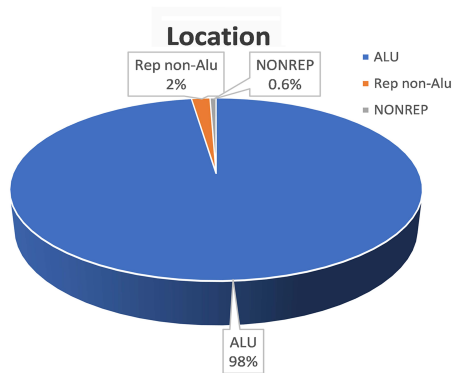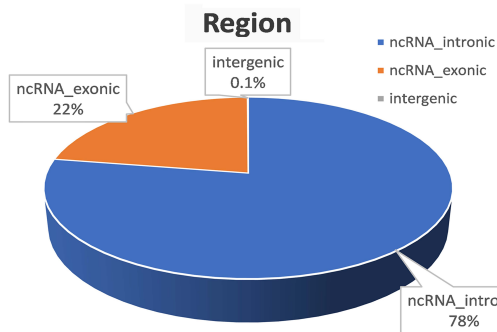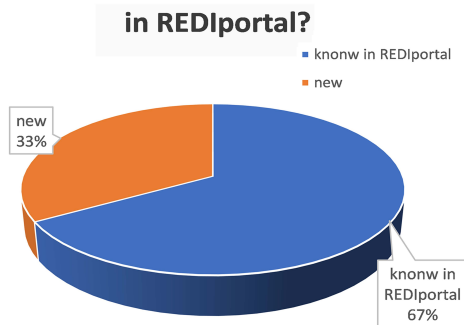

c

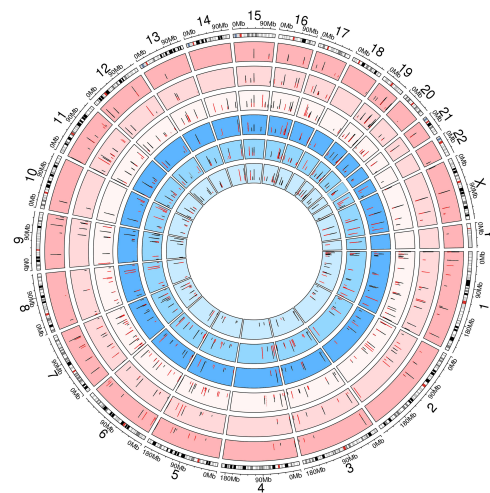

Supplement: s1 [file s1]
